# Supplementary material for: m6A Regulator-Mediated Methylation Modification Patterns and Characteristics of Immunity in Blood Leukocytes of COVID-19 Patients
Source: PubMed Central journal article supplement (PMC8669770; doi:10.3389/fimmu.2021.774776), 2021-11-30

**Figure S1 (A-C)** Consensus clustering matrix based on 20 m<sup>6</sup>A genes for k=3-5. **(D-E)** The consensus distribution and Delta area for k=2-5. **(F)** The PCA of the m<sup>6</sup>A clusters.

**Figure S2 (A-C)** The previral genes between the m<sup>6</sup>A clusters

**Figure S3 (A-C)** The stimular genes **(A)**, inhibitor genes **(B)** and MHC genes **(C)** between the m<sup>6</sup>A clusters. \*p<0.05, \*\*p<0.01, \*\*\*p<0.001, \*\*\*\*p<0.0001.

**Figure S4 (A-C)** Consensus clustering matrix based on 6771 DEGs for k=2-5. **(D)** The consensus distribution area for k=2-5. **(E)** The PCA of the Gene clusters. **(F)** The 20 m<sup>6</sup>A genes between the Gene clusters. \*p<0.05, \*\*p<0.01, \*\*\*p<0.001, \*\*\*\*p<0.0001.

**Figure S5 (A-B)** The HFD45 **(A)** and m<sup>6</sup>A score **(B)** between the Gene clusters. **(C-F)** The boxplot of m<sup>6</sup>A score in groups of different clinical characteristics including sex **(C)**, ICU **(D)**, mechanical ventilation **(E)** and diabetes **(F)**. **(G)** The correlation between m<sup>6</sup>A score and common pathways.

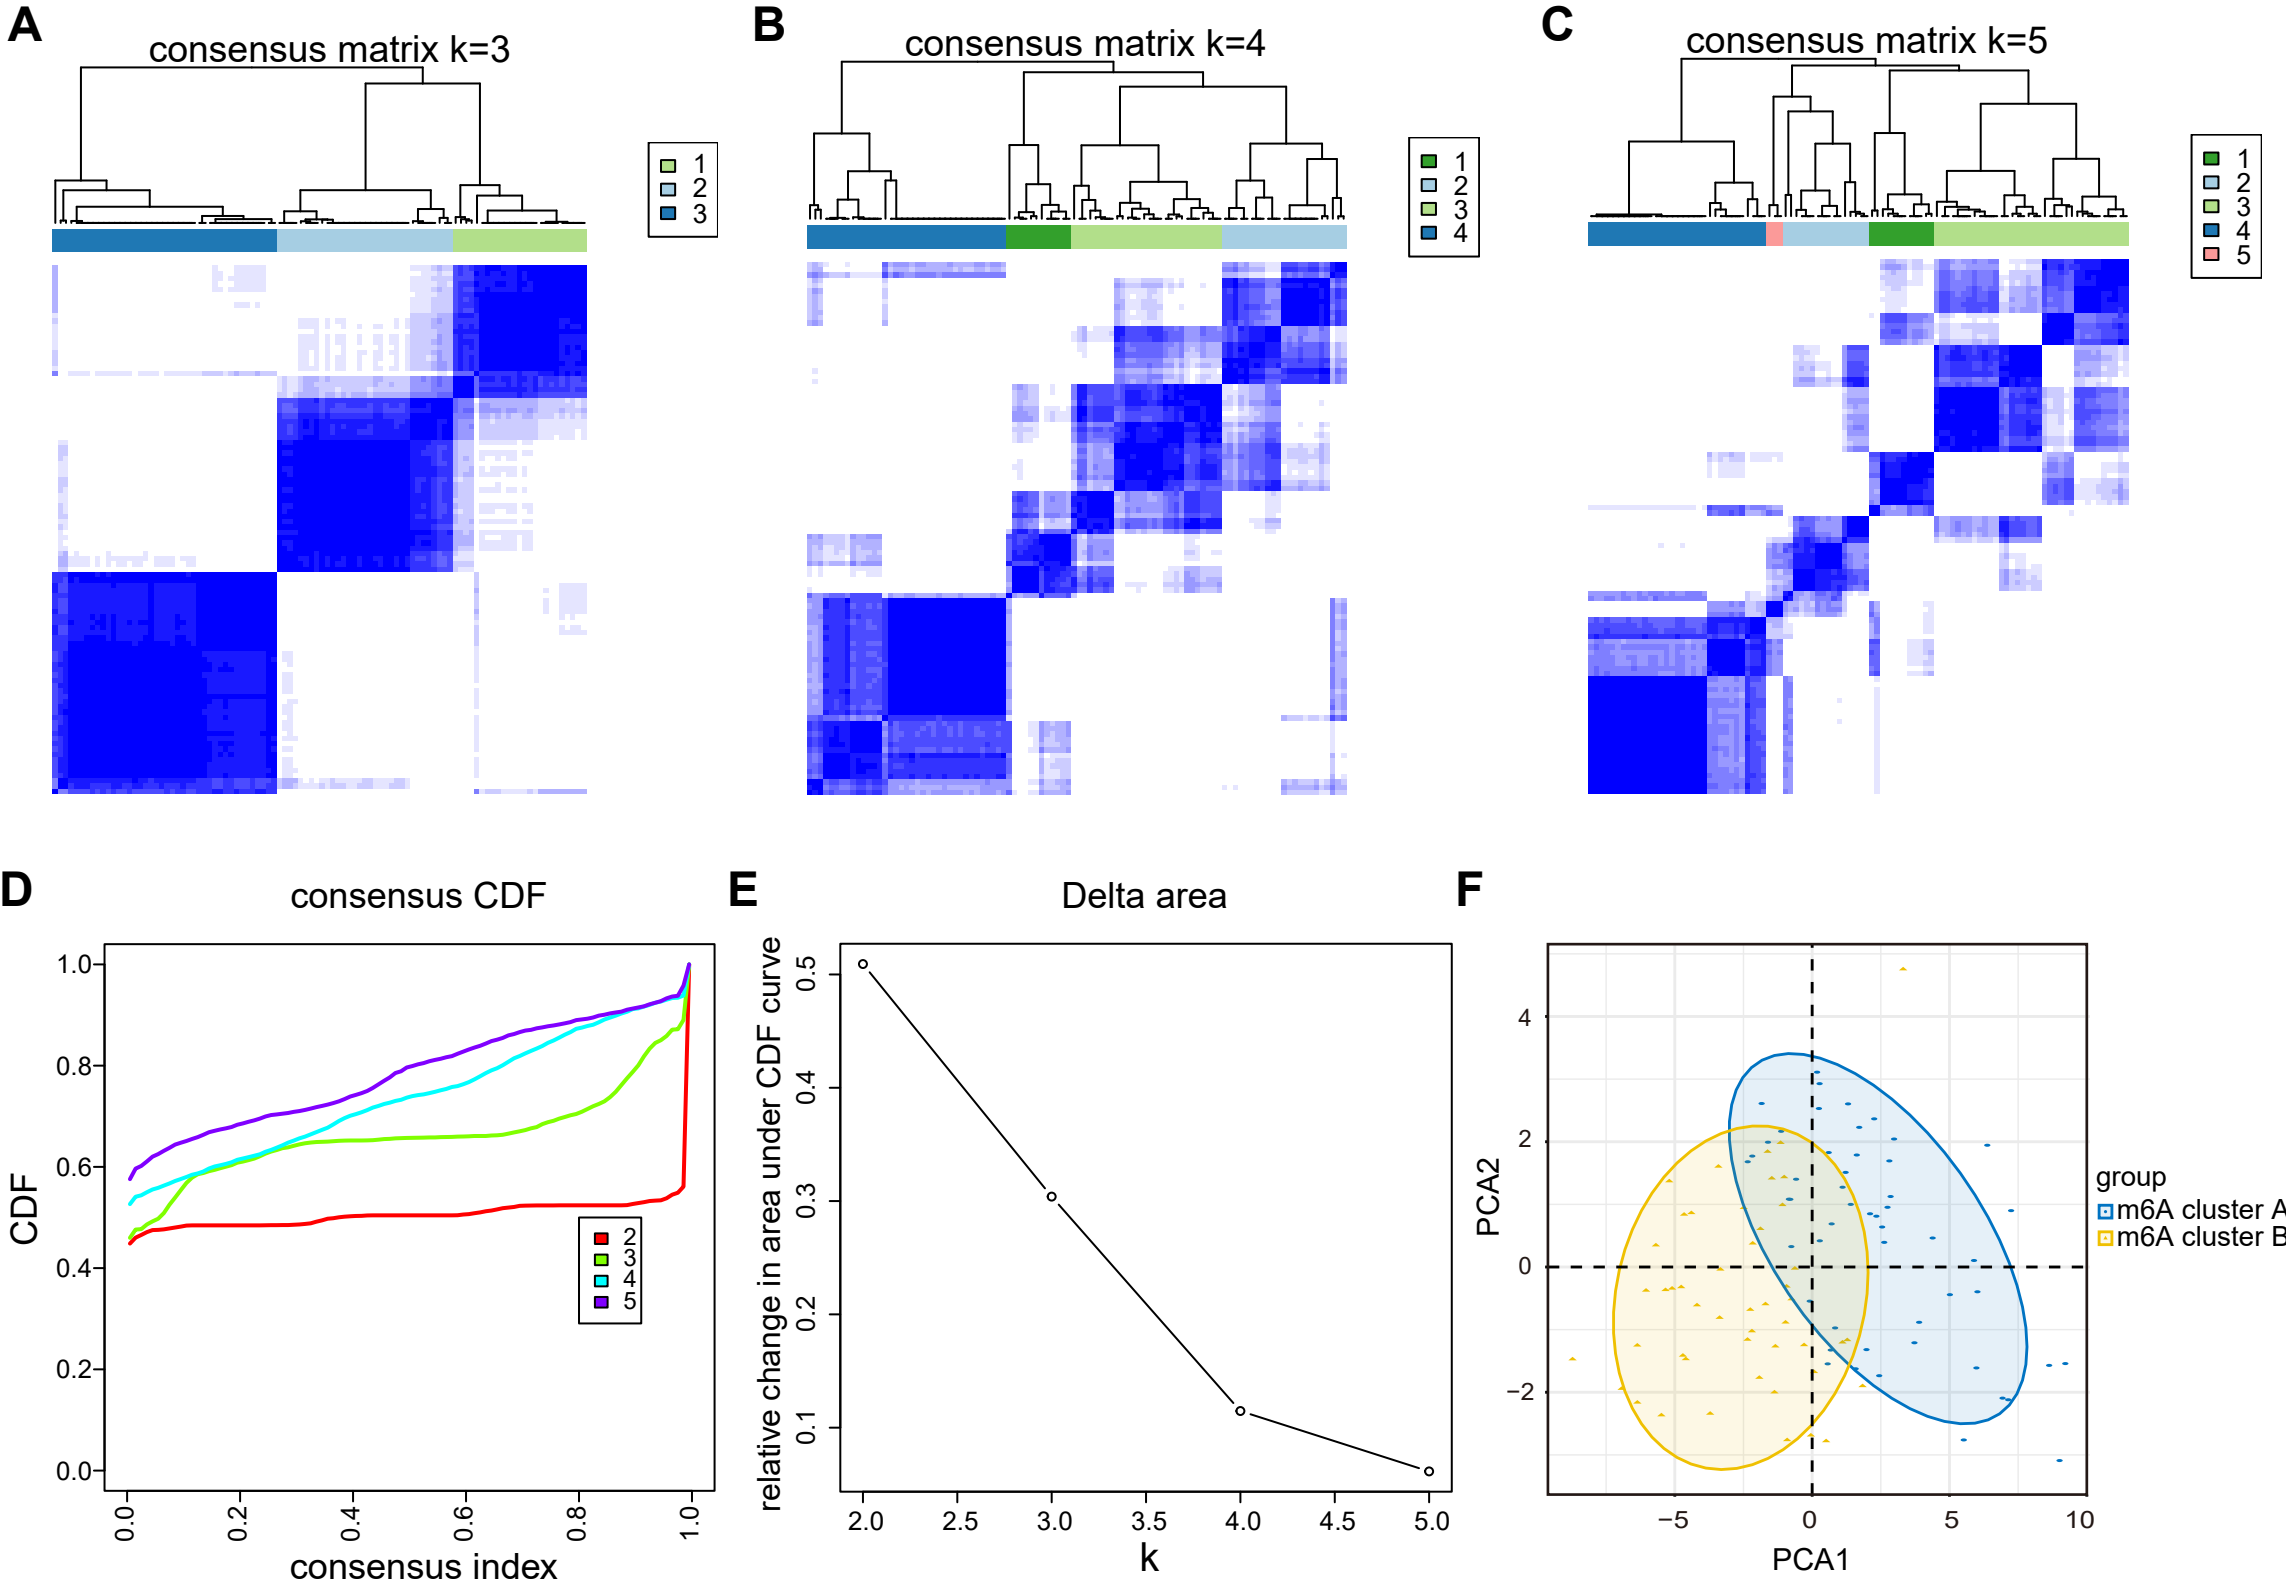

Figure S1

**A**group ■ m6A cluster A ■ m6A cluster B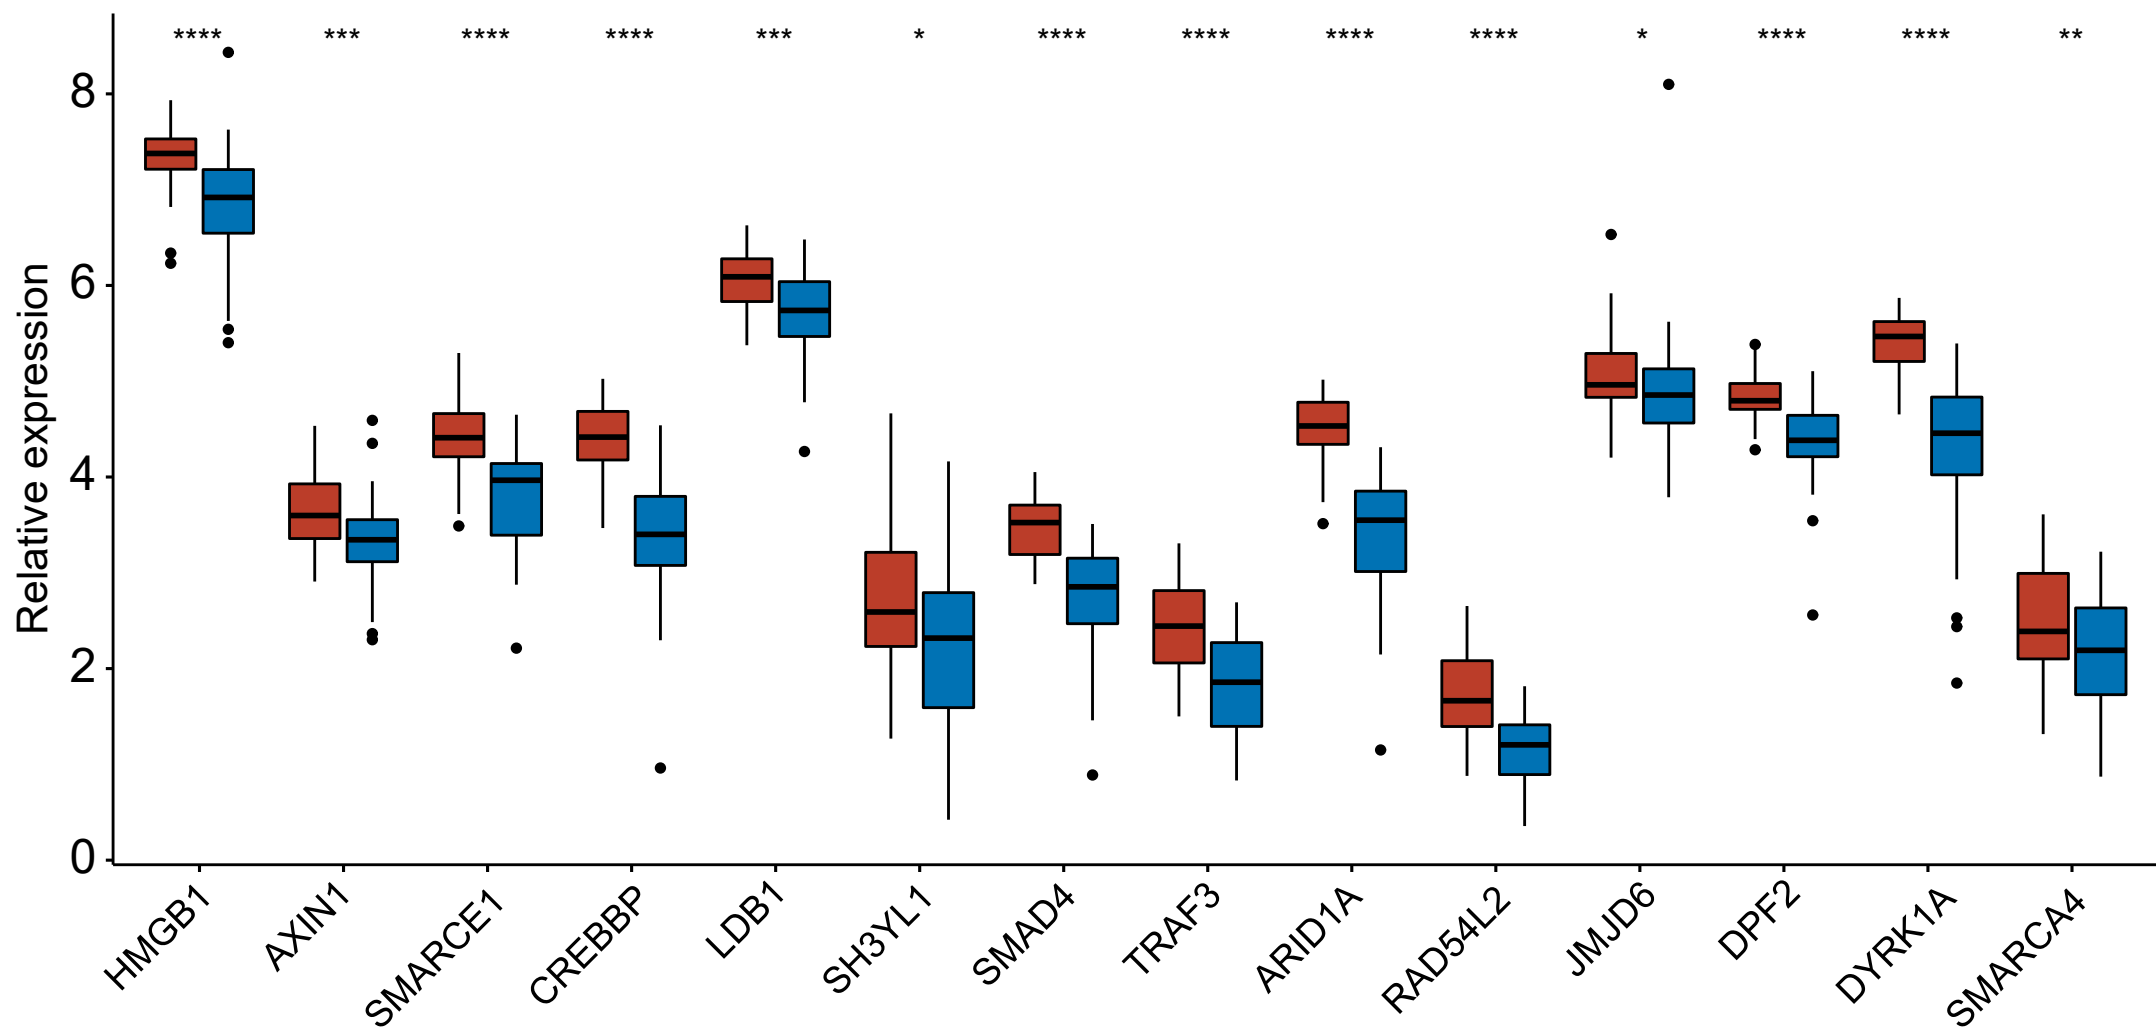**B**group ■ m6A cluster A ■ m6A cluster B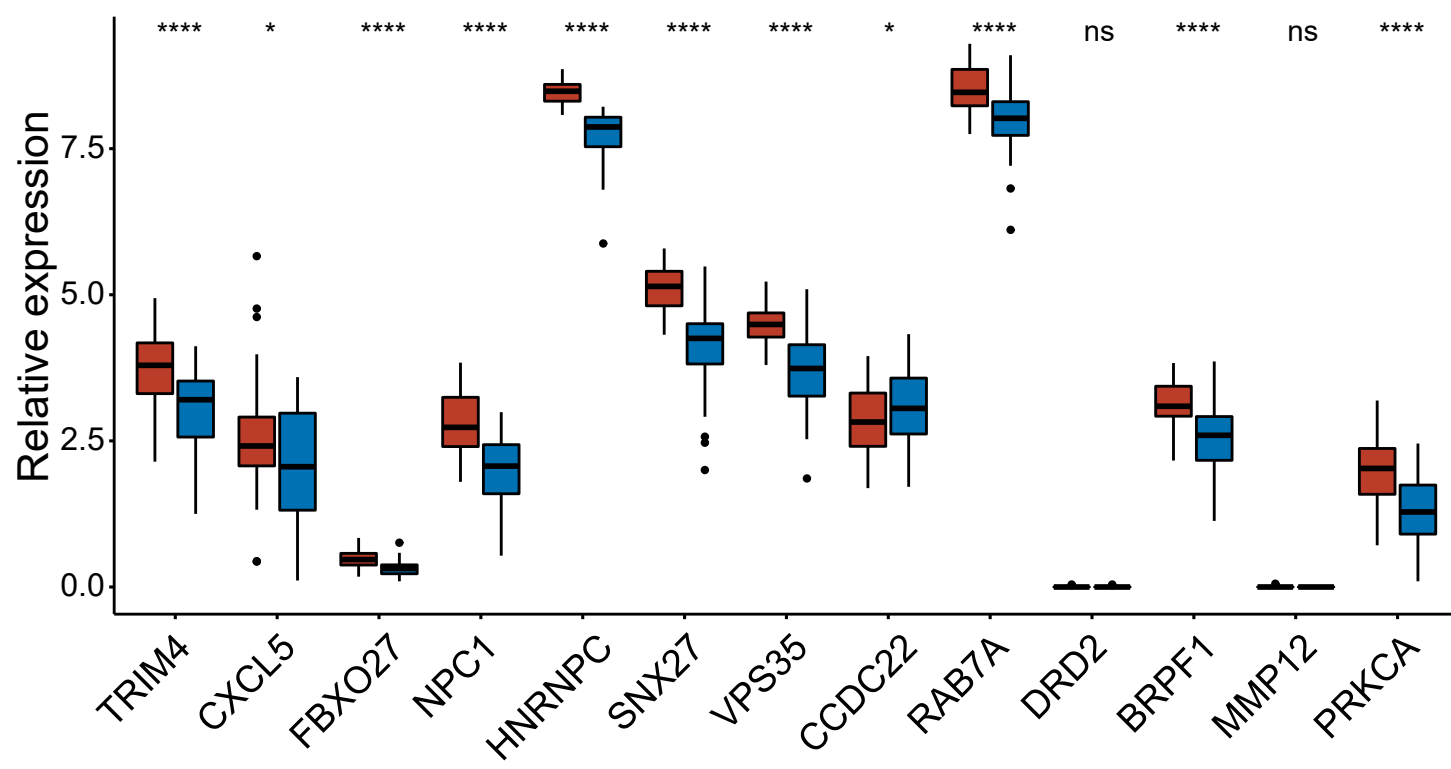**C**group ■ m6A cluster A ■ m6A cluster B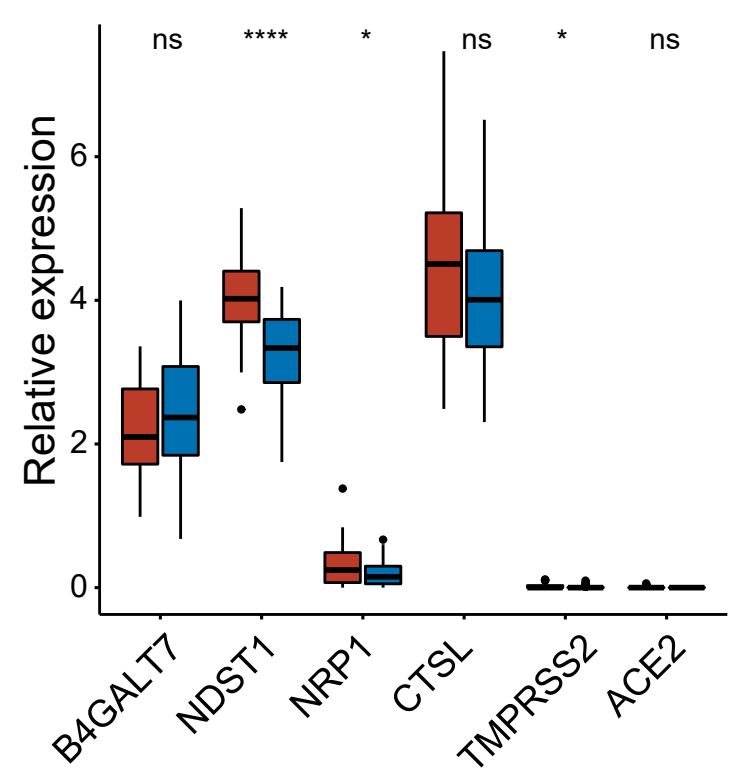

Figure S2

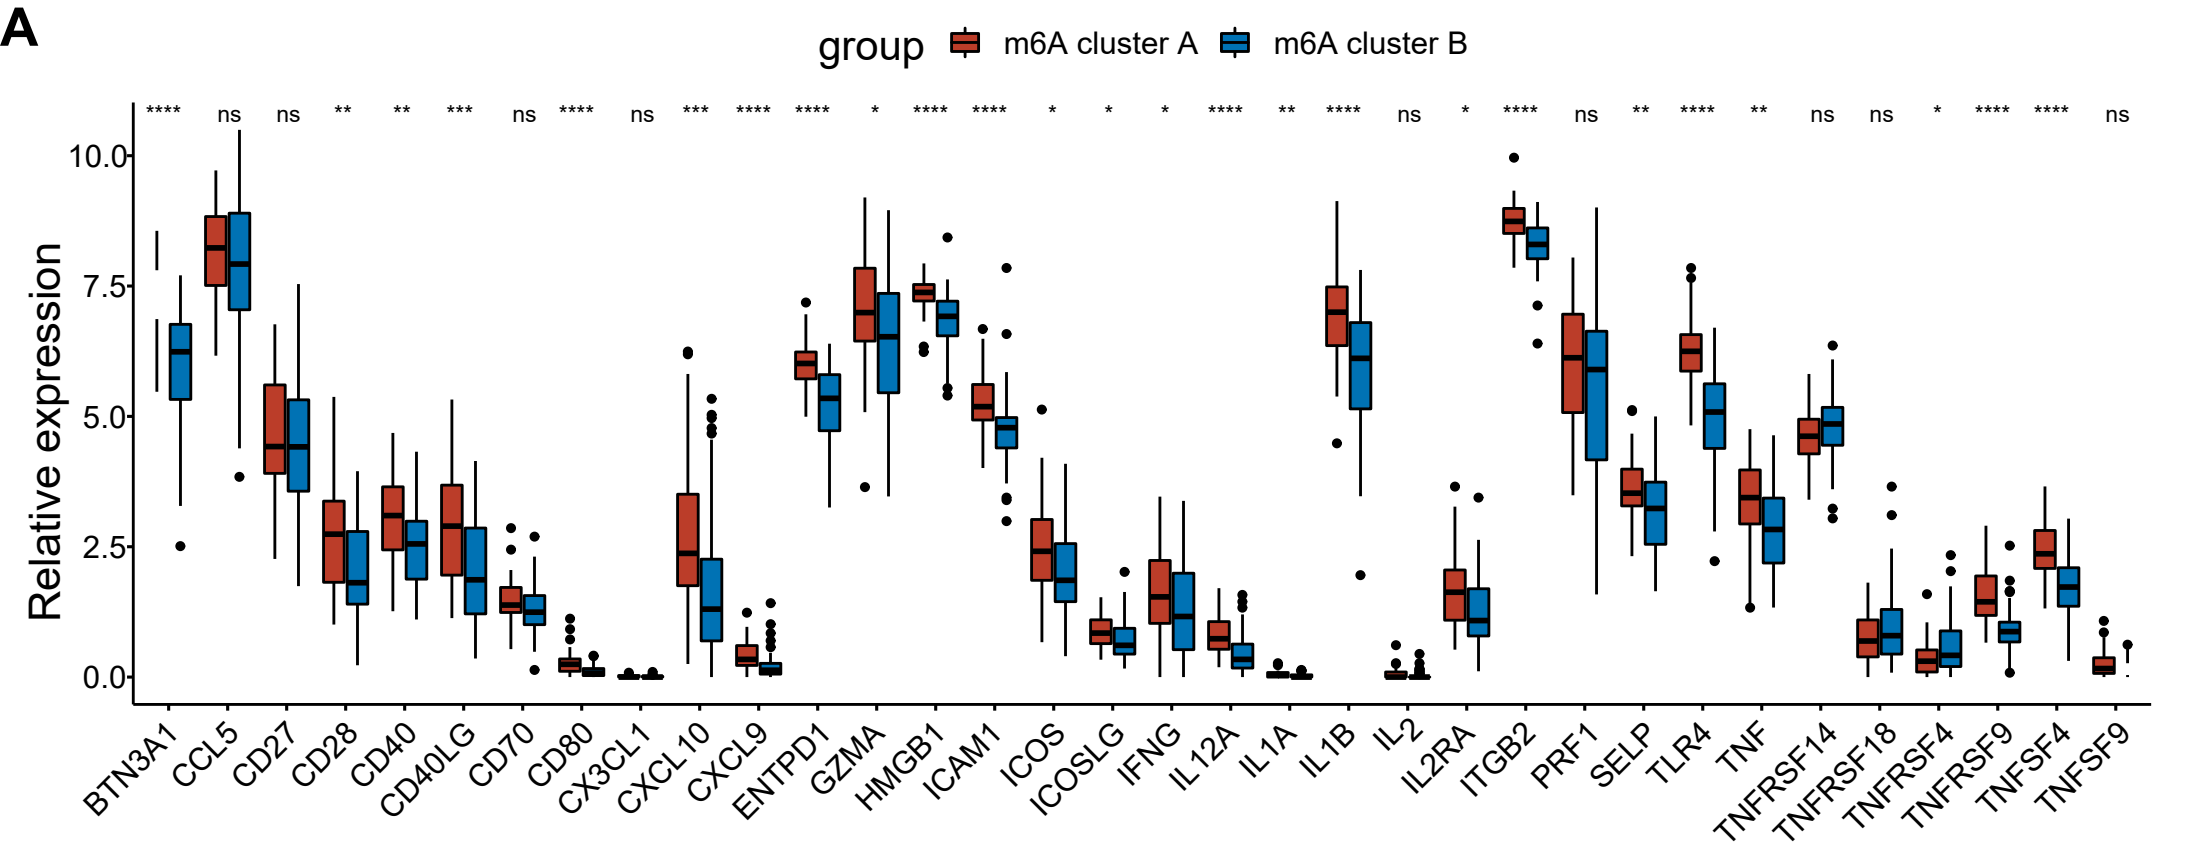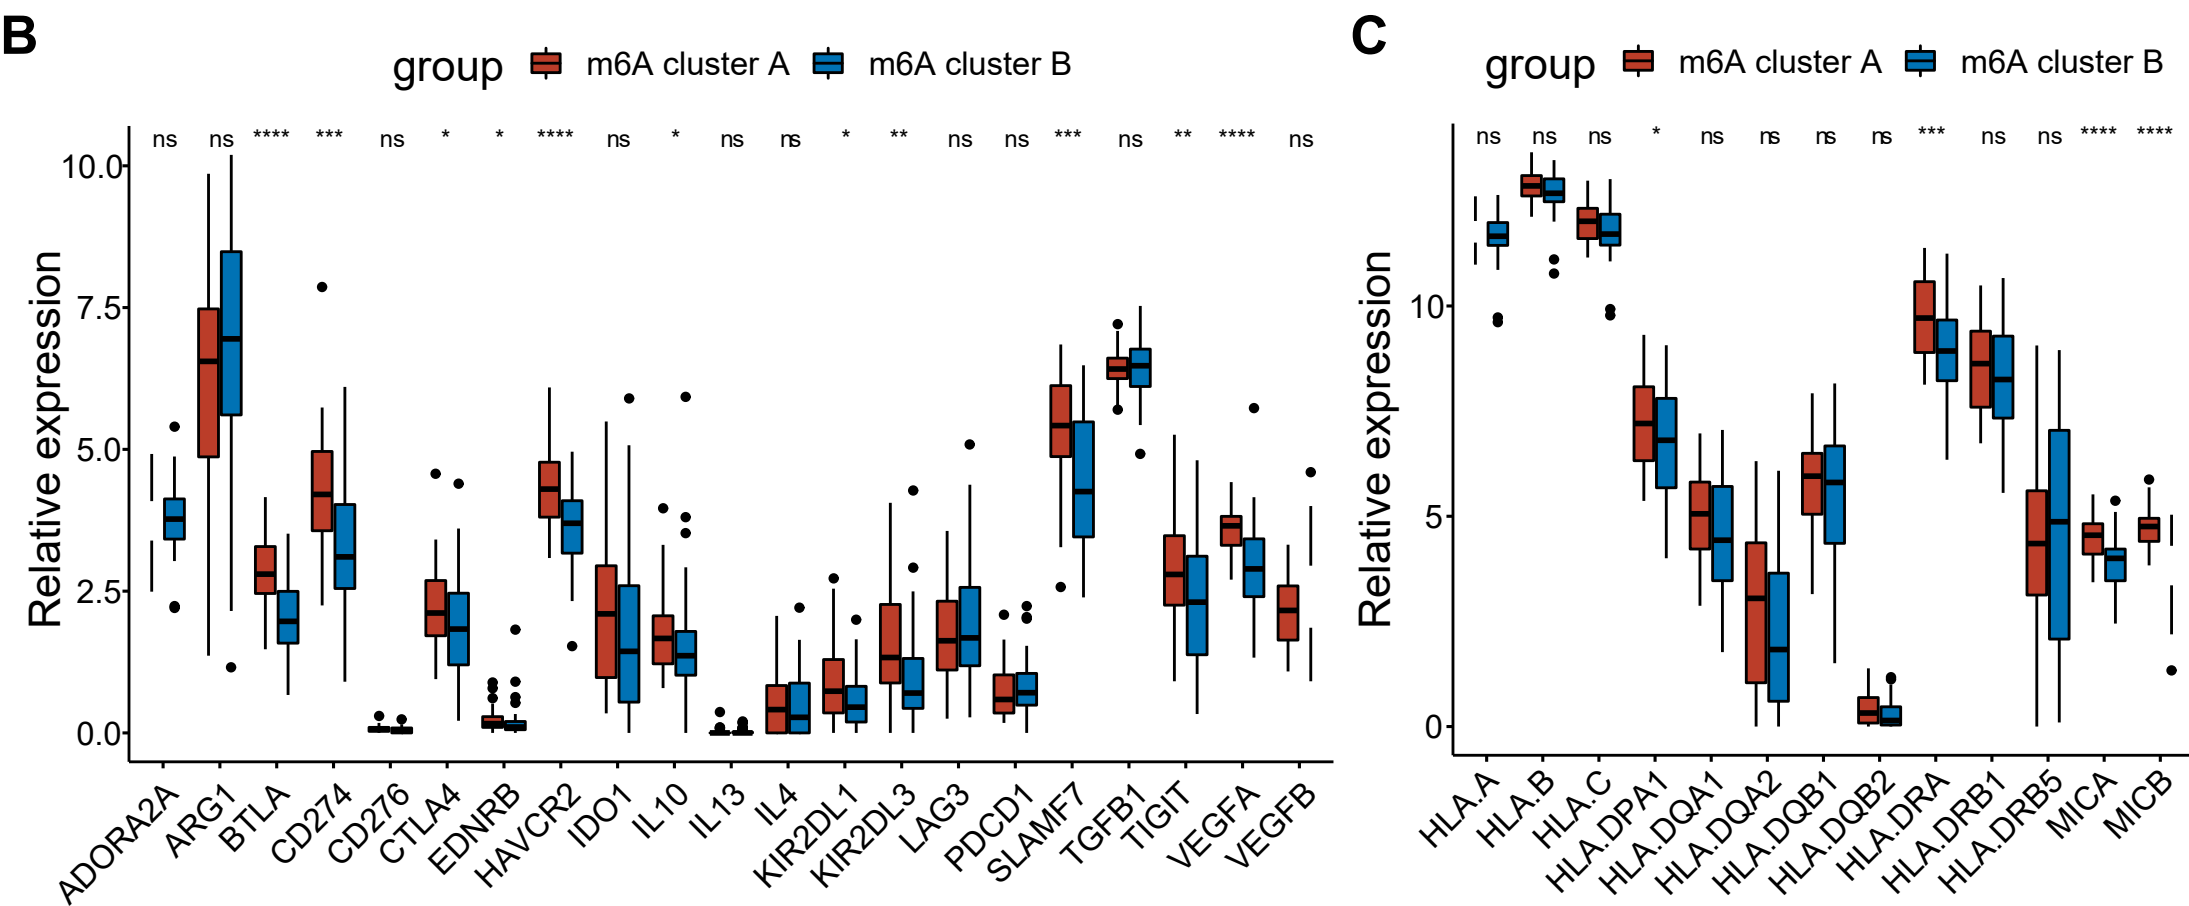

Figure S3

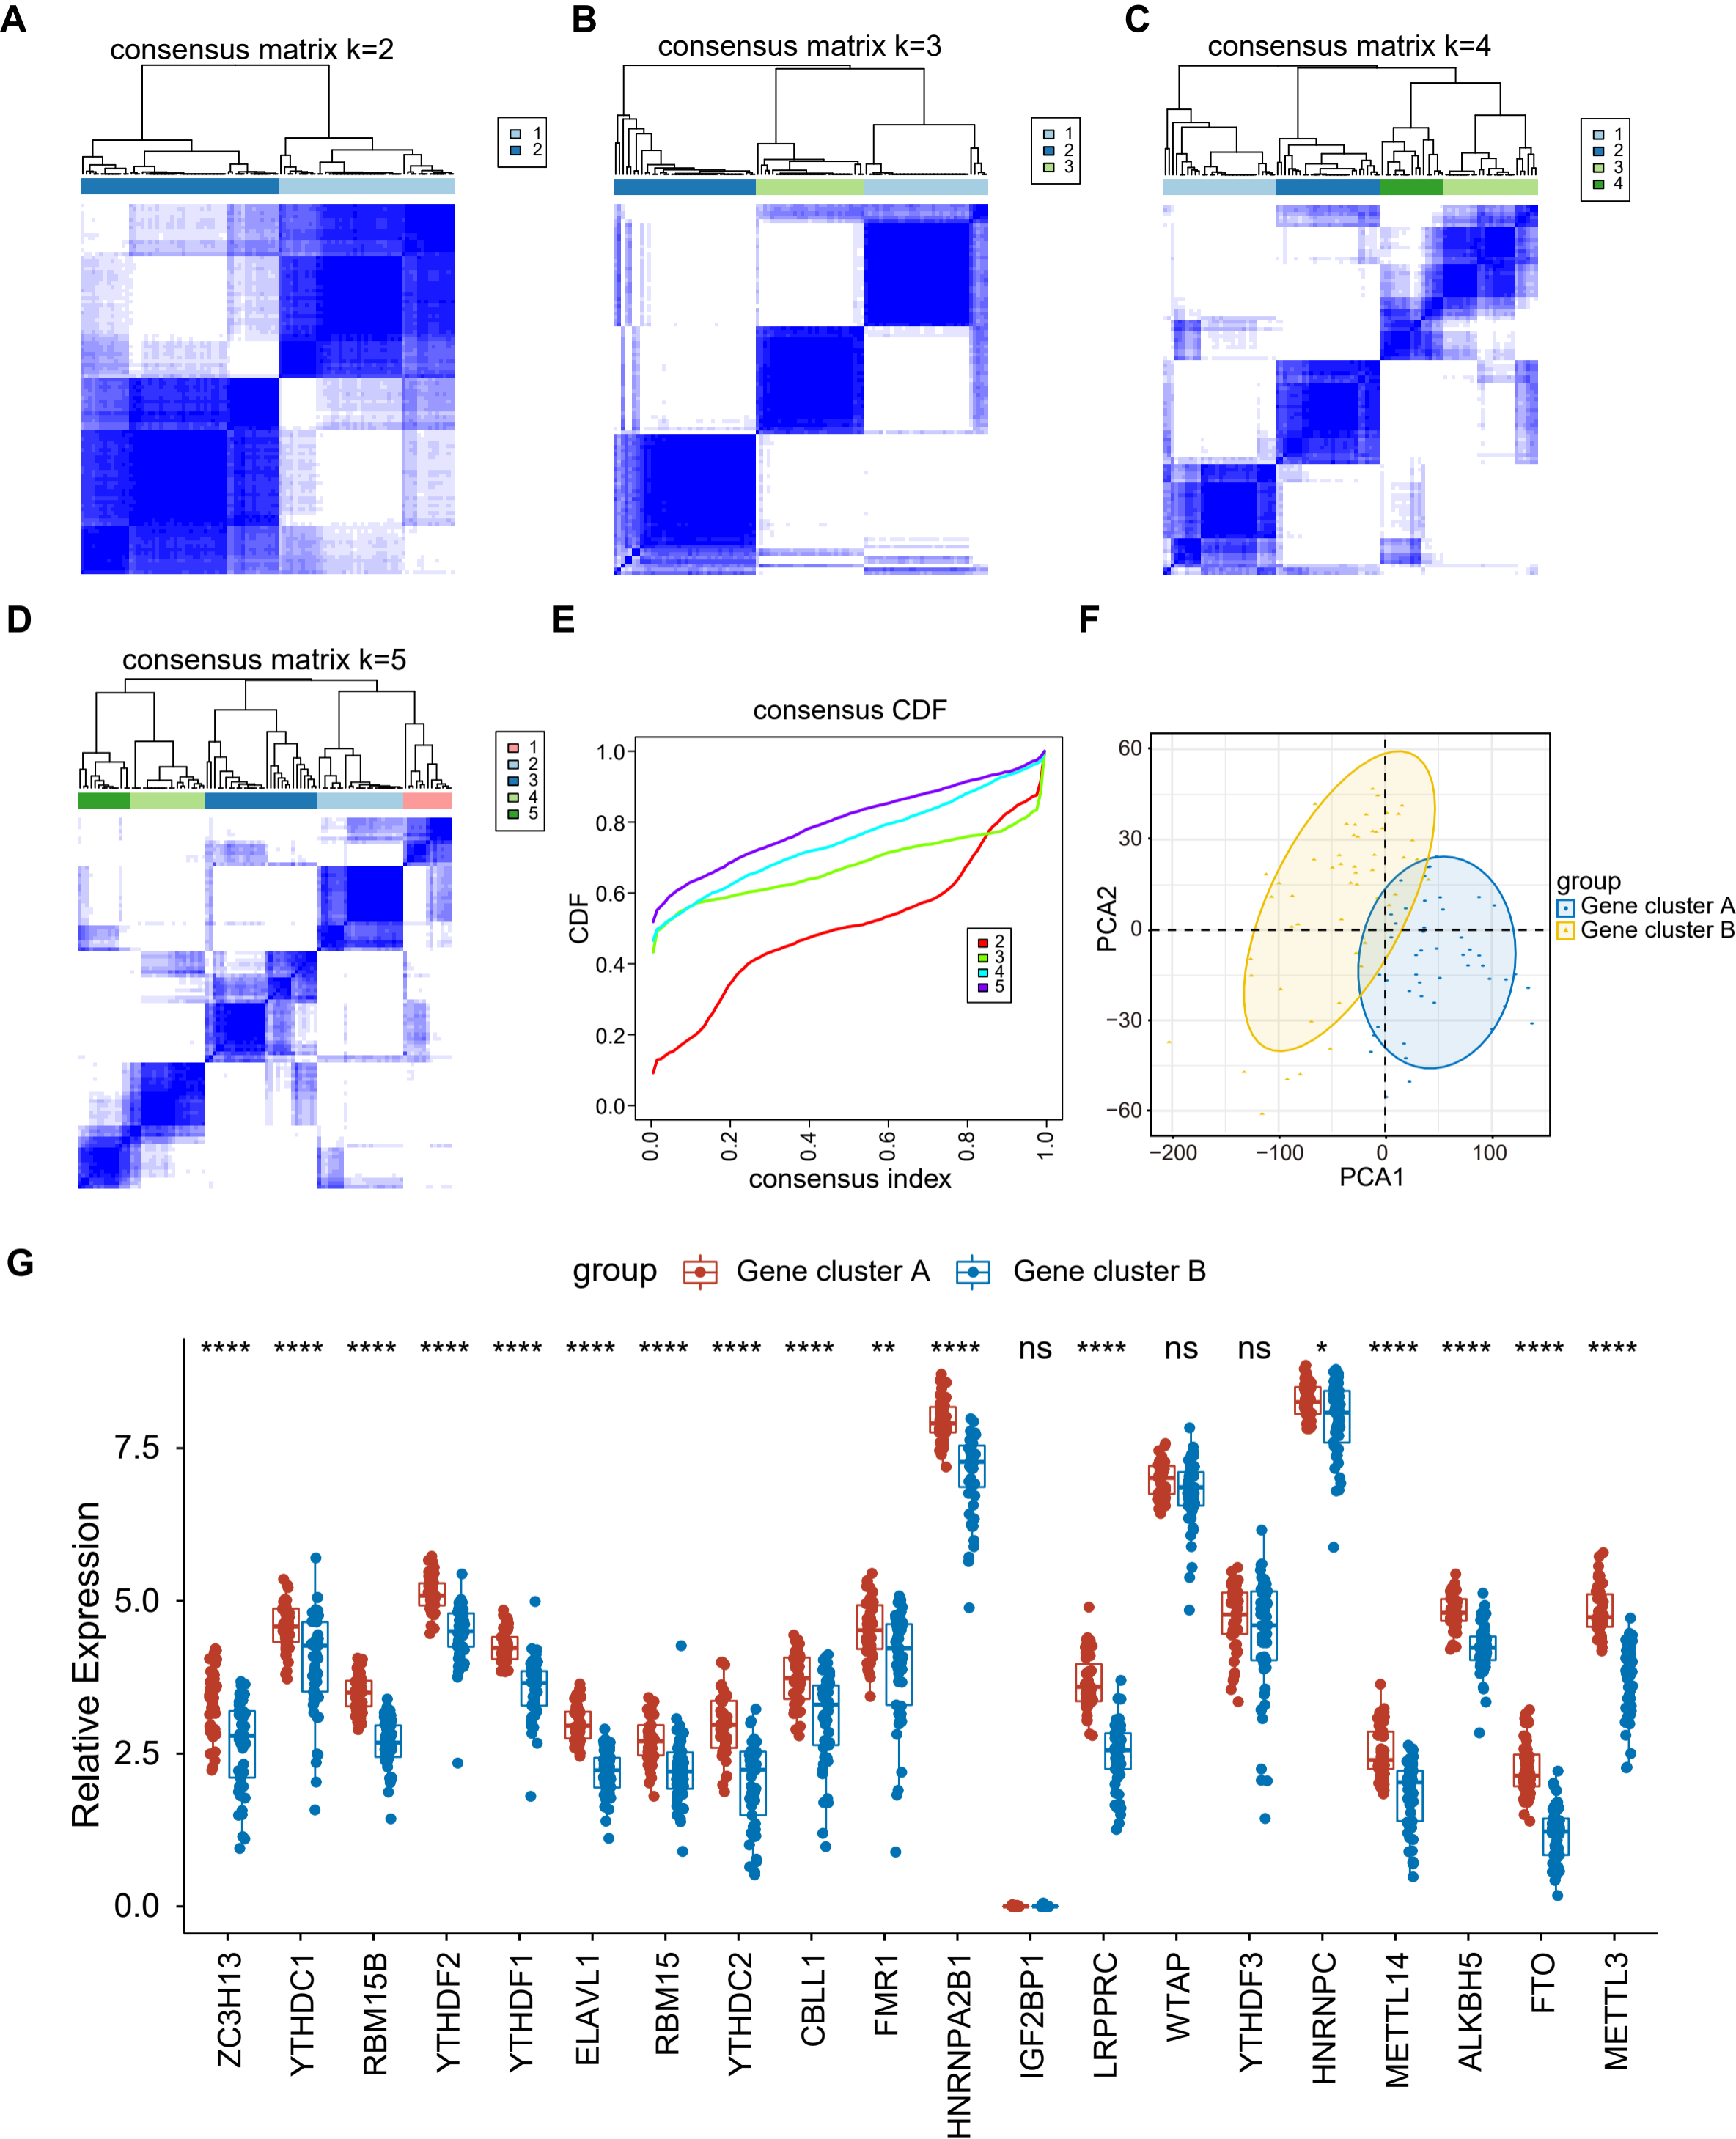

Figure S4

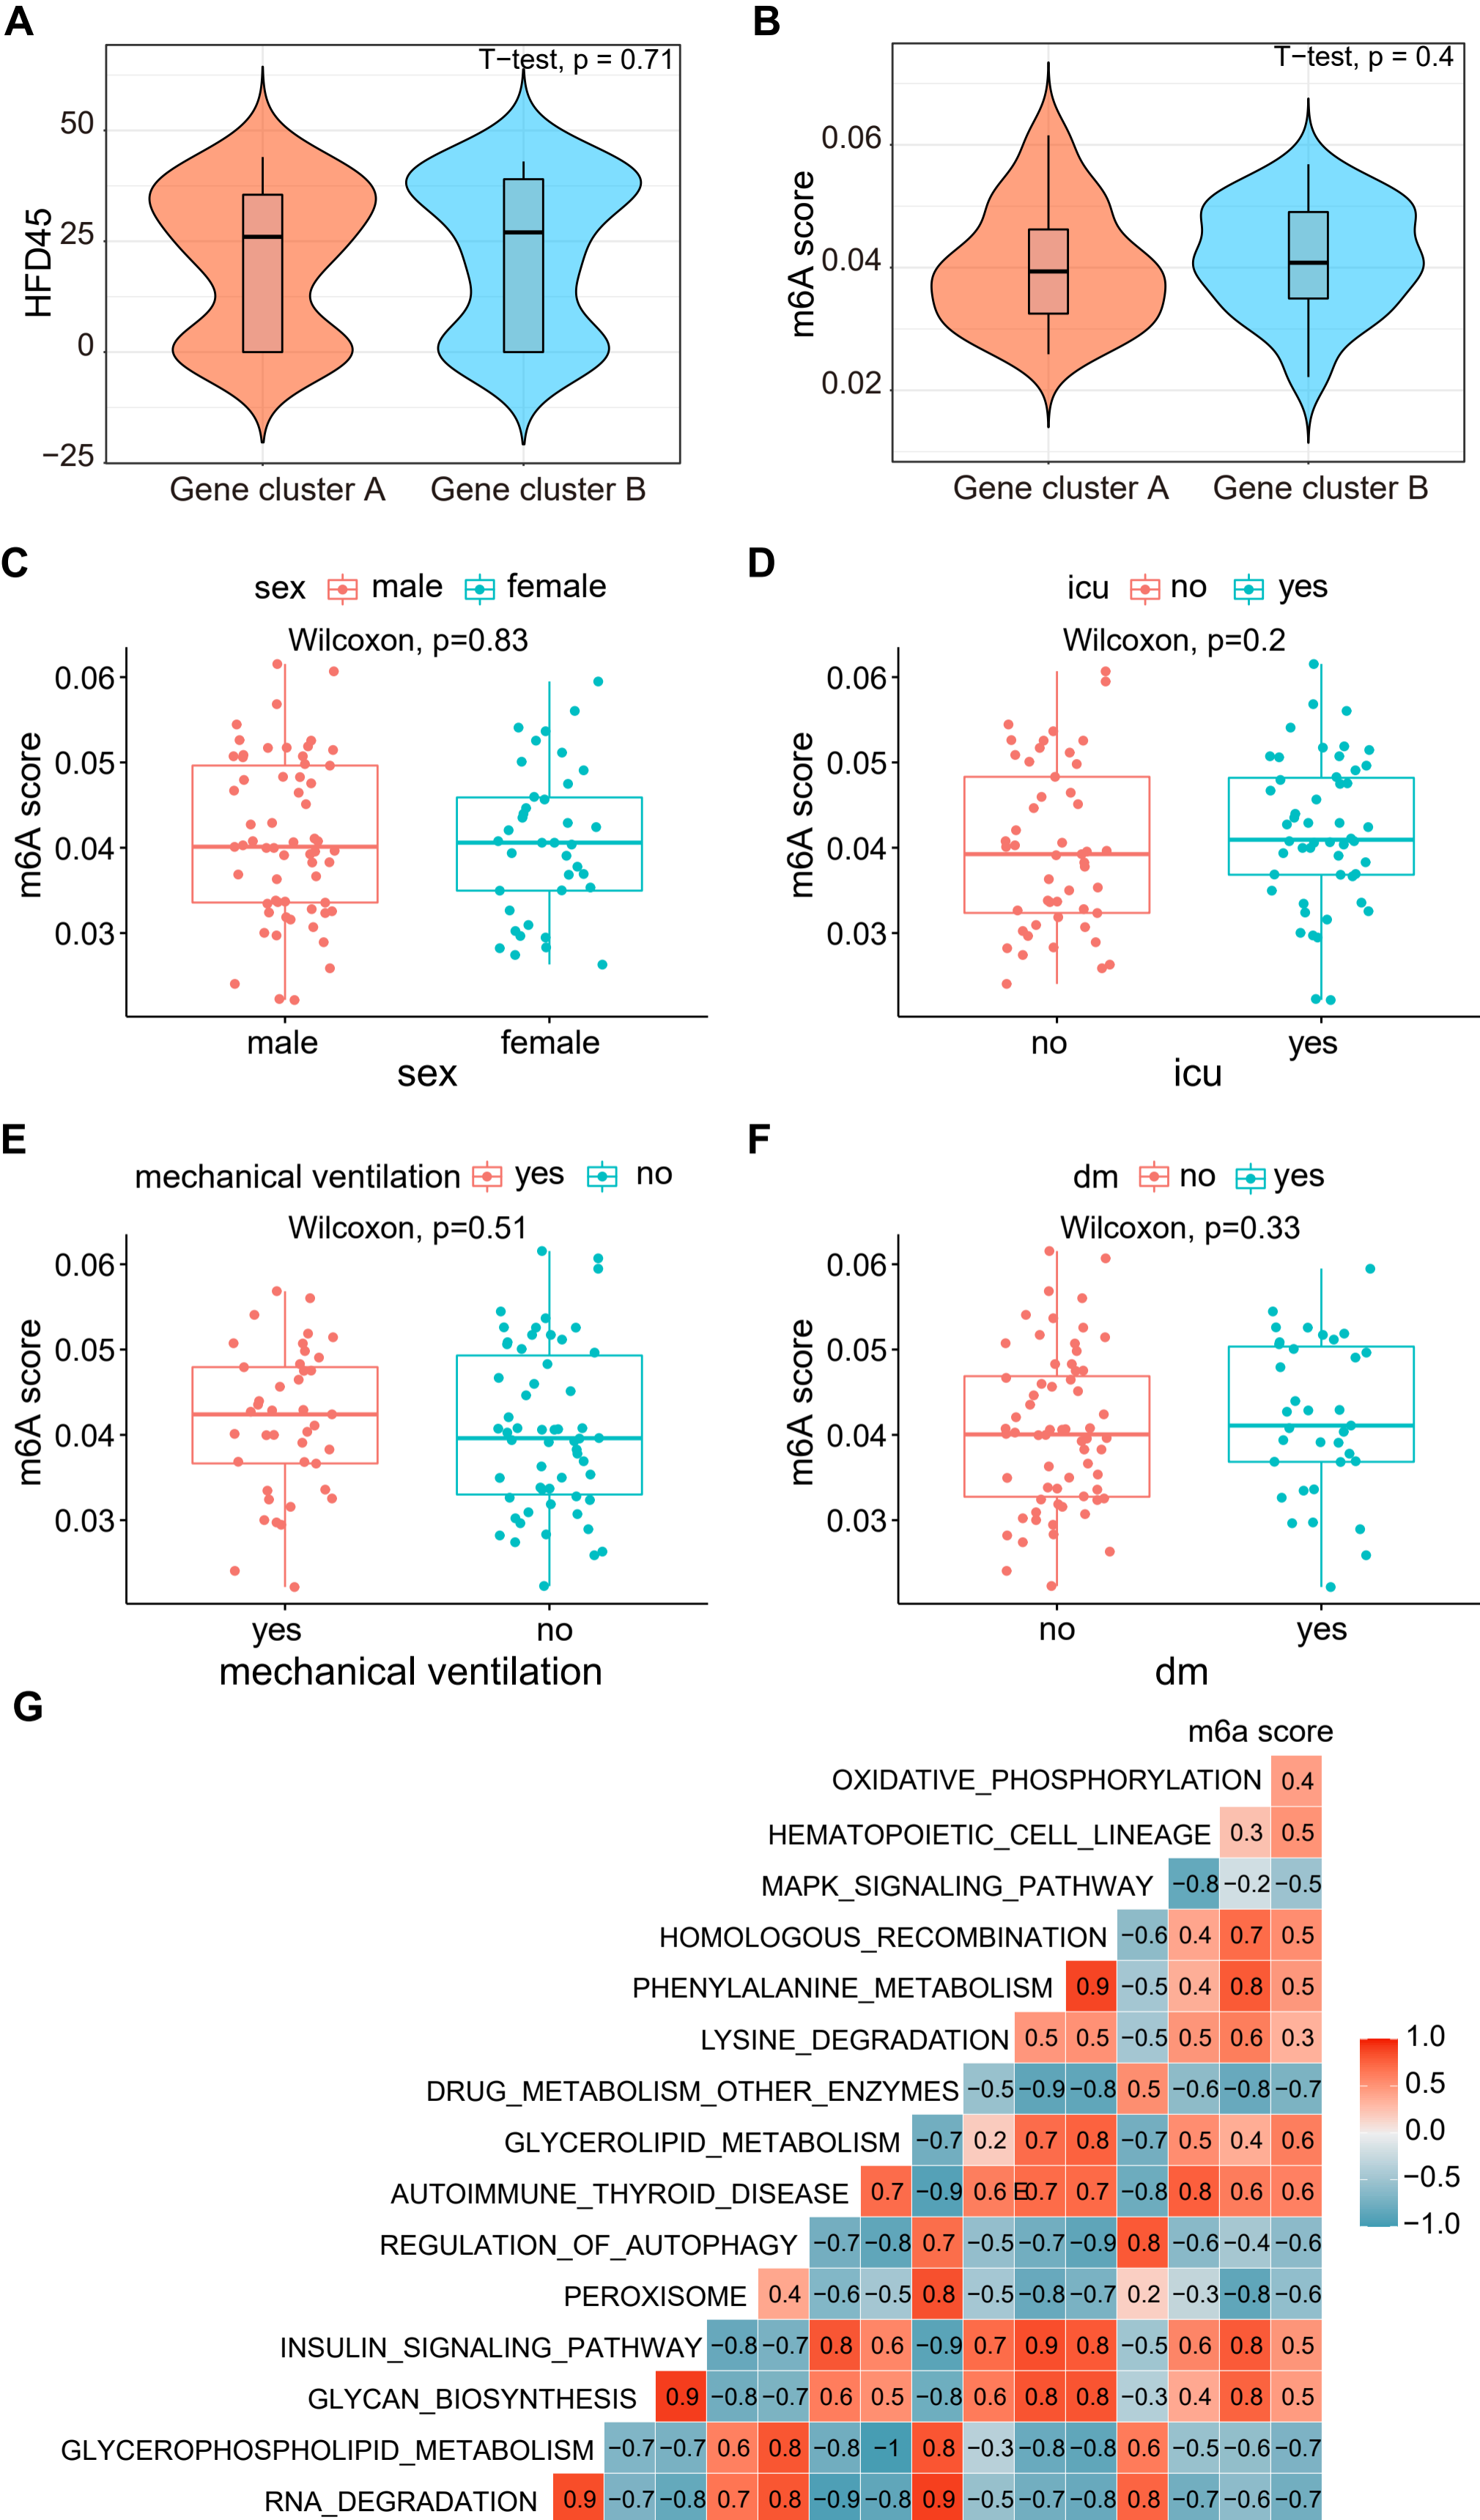

Supplement: DataSheet_1.pdf [file DataSheet_1.pdf]
